# Supplementary material for: V2O5 nanosheets supported on 3D N-doped carbon nanowall arrays as an advanced cathode for high energy and high power fiber-shaped zinc-ion batteries
Source: Royal Society of Chemistry journal article supplement (doi:10.1039/c9ta01164a), 2019-01-01
Supplement: c9ta01164a1.pdf [file c9ta01164a1.pdf]

# **V<sub>2</sub>O<sub>5</sub> Nanosheets Supported on 3D N-Doped Carbon Nanowall Arrays as an Advanced Cathode for High Energy and High Power Fiber-Shaped Zinc-Ion Battery**

Bing He<sup>+a,b,c,d</sup>, Zhenyu Zhou<sup>+a,b,c</sup>, Ping Man<sup>+a,b,c</sup>, Qichong Zhang<sup>a,b</sup>, Chaowei Li<sup>a,b,c</sup>, Liyan Xie<sup>a,b,c</sup>, Xiaona Wang<sup>a</sup>, Qiulong Li<sup>a,b</sup>, and Yagang Yao<sup>\* a,b,d</sup>

a. Division of Advanced Nanomaterials, Key Laboratory of Nanodevices and Applications, Joint Key Laboratory of Functional Nanomaterials and Devices, CAS Center for Excellence in Nanoscience, Suzhou Institute of Nano-tech and Nano-bionics, Chinese Academy of Sciences, Suzhou 215123, China

b. National Laboratory of Solid State Microstructures, College of Engineering and Applied Sciences, and Collaborative Innovation Center of Advanced Microstructures, Nanjing University, Nanjing 210093, China

c. School of Nano Technology and Nano Bionics, University of Science and Technology of China, Hefei, 230026, China

d. Division of Nanomaterials, Suzhou Institute of Nano-Tech and Nano-Bionics, Nanchang, Chinese Academy of Sciences, Nanchang 330200, China

[\*] Corresponding author: Email: ygyao2013@sinano.ac.cn

[+] These authors contribute equally to this work.

## 1. Materials

2-Methylimidazole ( $C_4H_6N_2$ , 98%), Cobalt nitrate ( $Co(NO_3)_2 \cdot 6H_2O$ , 99%), Iron chloride hexahydrate ( $FeCl_3 \cdot 6H_2O$ , 99%), Zinc chloride ( $ZnCl_2$ , 98%), Zinc sulfate heptahydrate ( $ZnSO_4 \cdot 7H_2O$ , 99.5%) sodium sulfate ( $Na_2SO_4$ , 99%) and PVA (98.0~99.0%) were provided by Aladdin. Isopropanol ( $C_3H_8O$ ), Methanol ( $CH_4O$ , 99.9%), boric acid ( $H_3BO_3$ , 99.8%), ethanol ( $C_2H_6O$ , 99.7%), and Hydrochloric acid (HCl, 36%~38%) were purchased from Sinopharm Chemical Reagent, China., Triisopropoxyvanadium(V) oxide ( $C_9H_{21}O_4V$ , 97%) were provided by Tokyo Chemical Industry CO., LTD.

## 2. Electrochemical Performance Measurements

The electrochemical characterizations of obtained electrode materials was analyzed by cyclic voltammetry curves, galvanostatic charge/discharge curves, and electrochemical impedance spectroscopy measured on an electrochemical workstation (CHI 760E, Chenhua). The electrochemical performance of the aqueous V-MOF-12//Zn, V-MOF-24//Zn and V-MOF-48//Zn batteries was characterized in a two-electrode cell with an aqueous electrolyte containing 2 M  $ZnSO_4$ .

The calculation equation of the electrode volume :

$$V = \frac{\pi D^2 L}{4} \quad (1)$$

where  $V$  ( $cm^3$ ) represents the total volume of the electrodes,  $D$  (cm) is the diameter of the electrodes with electrochemical active materials and  $L$  (cm) is the length of the electrodes.

## 3. Characterizations of materials

The morphologies and microstructures of the electrodes and pressure sensor were analyzed by using a scanning electron microscope (Hitachi S-4800, 5 KV). The crystal structure and chemical composition of samples were characterized by X-ray diffraction (Rigaku D/MAX2500 V) and X-ray photoelectron spectrometer (ESCALab MKII). Transmission electron microscopy images were

measured by a high-resolution transmission electron microscope (FEI Tecnai G2 20).

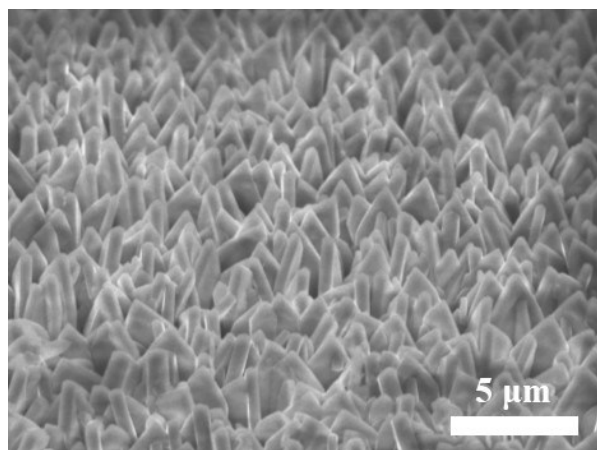

**Figure S1** The SEM image of CNTF@Co-MOF.

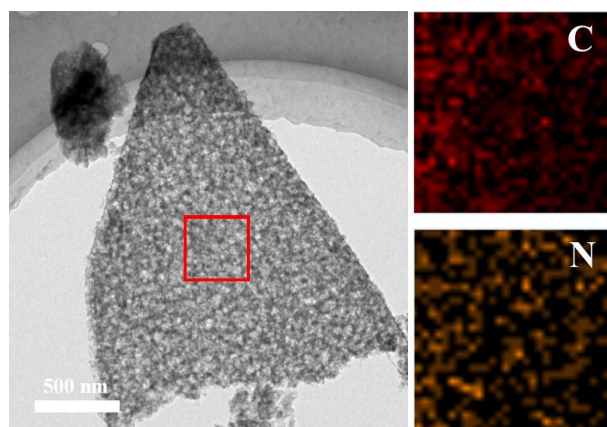

**Figure S2** EDX mappings of C and N elements measured from NC nanowall.

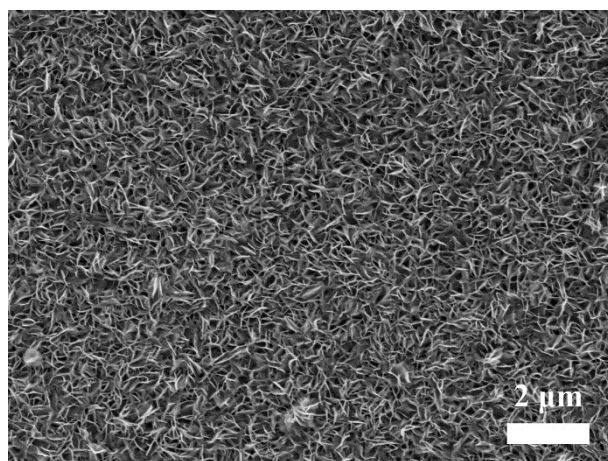

**Figure S3** The SEM images of CNTF@V<sub>2</sub>O<sub>5</sub>.

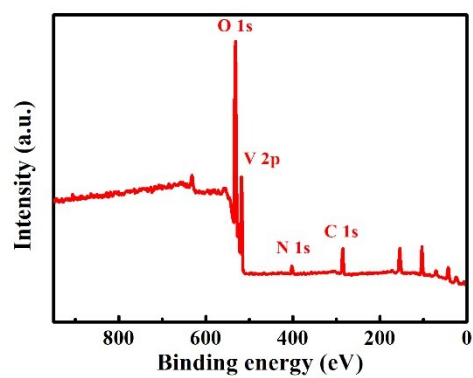

**Figure S4** The XPS spectrums (Fig. SX) of CNTF@NC@V<sub>2</sub>O<sub>5</sub>.

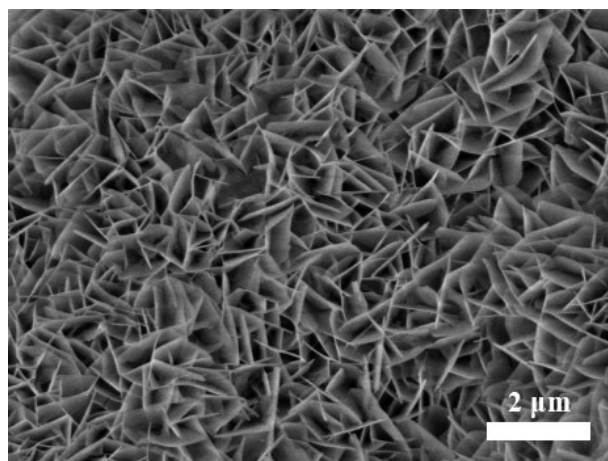

**Figure S5** The SEM image of CNTF@Zn.

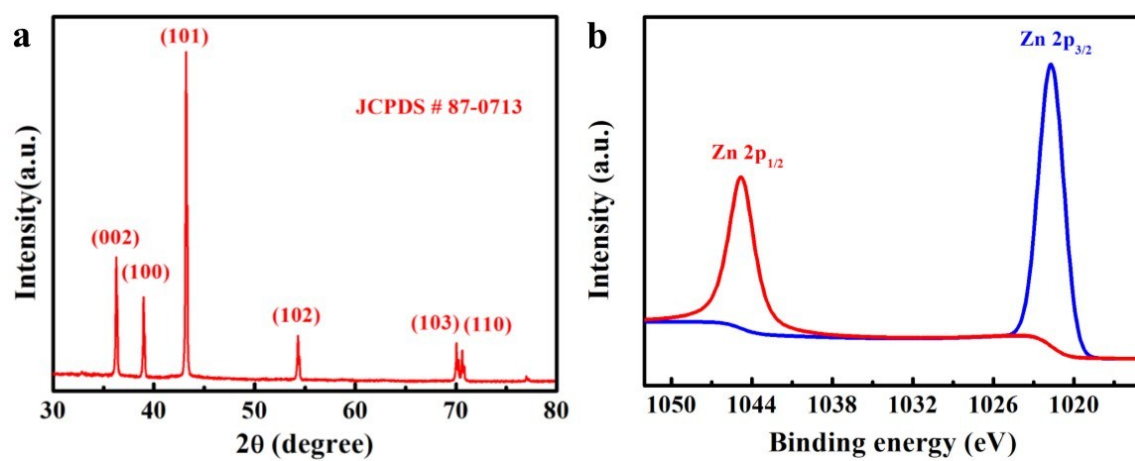

**Figure S6** The XRD pattern and XPS spectrum of Zn nanosheets.

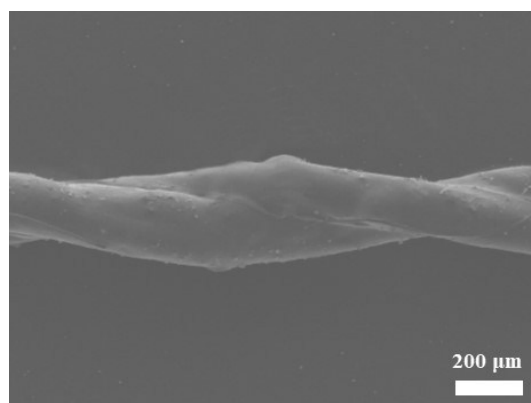

**Figure S7** The SEM image of the assembled fiber-shaped Zn-ion battery.

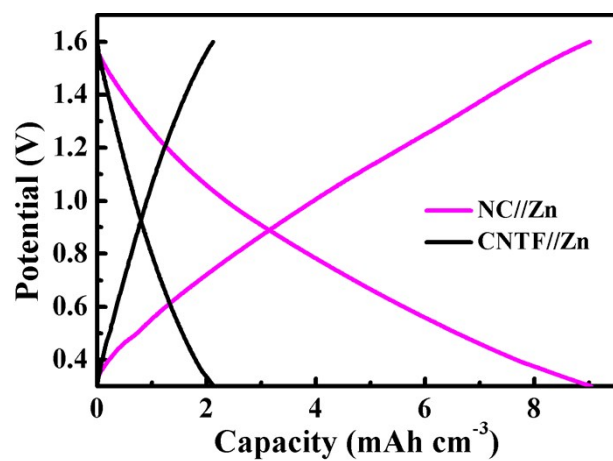

**Figure S8** The GCD curves of CNTF//Zn and CNTF@NC//Zn batteries at a current density of 0.3 A cm<sup>-3</sup>.

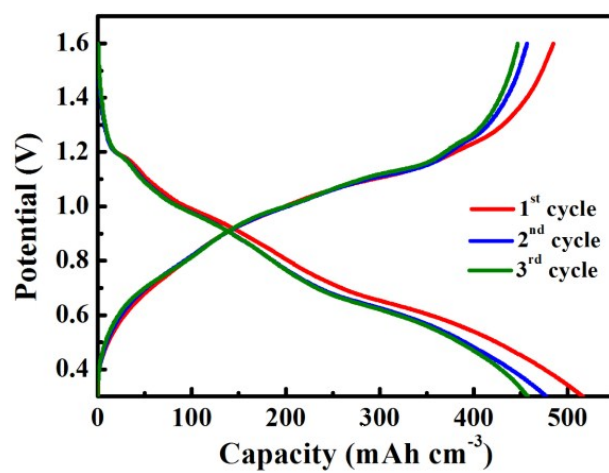

**Figure S9** The GCD curves of initial three cycles for the NC@V<sub>2</sub>O<sub>5</sub>//Zn battery.

**Table S1** The volumetric capacities based on the whole volume of cathode and anode

|                                            |        |        |        |        |        |        |        |        |
|--------------------------------------------|--------|--------|--------|--------|--------|--------|--------|--------|
| Current densities<br>(A cm <sup>-3</sup> ) | 0.146  | 0.293  | 0.585  | 1.17   | 2.93   | 4.39   | 7.32   | 14.6   |
| Capacities<br>(mAh cm <sup>-3</sup> )      | 222.93 | 203.27 | 192.05 | 181.61 | 167.83 | 150.24 | 133.17 | 106.10 |

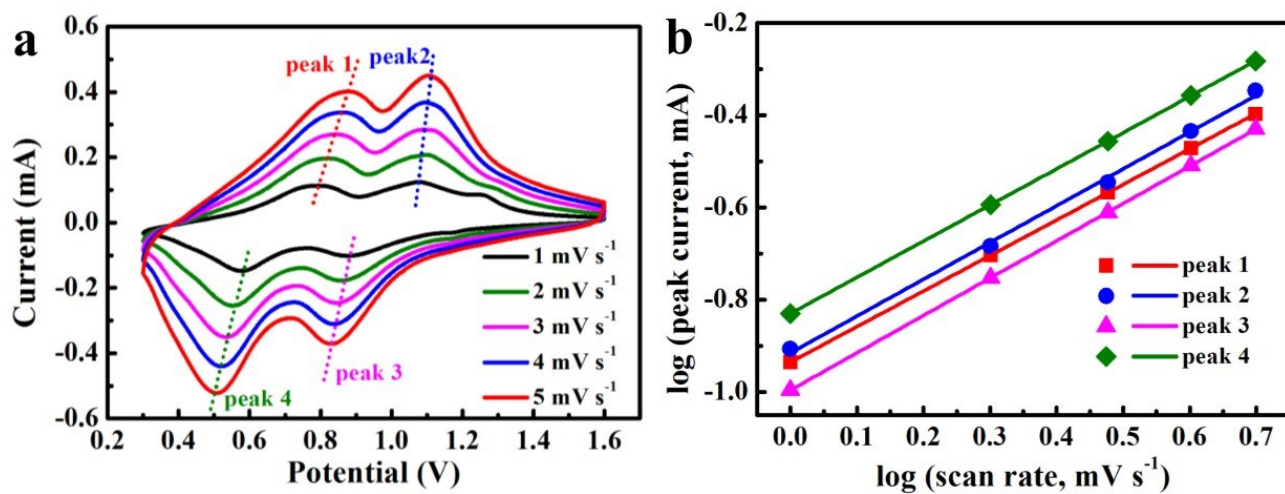

**Figure S10** The CV curves of  $V_2O_5//Zn$  battery at various scan rates.

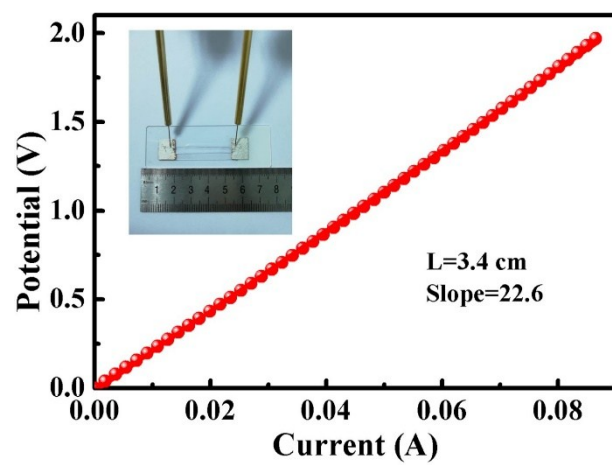

**Figure S11** Current-voltage characteristic curve of the CNTF@NC@V<sub>2</sub>O<sub>5</sub>.

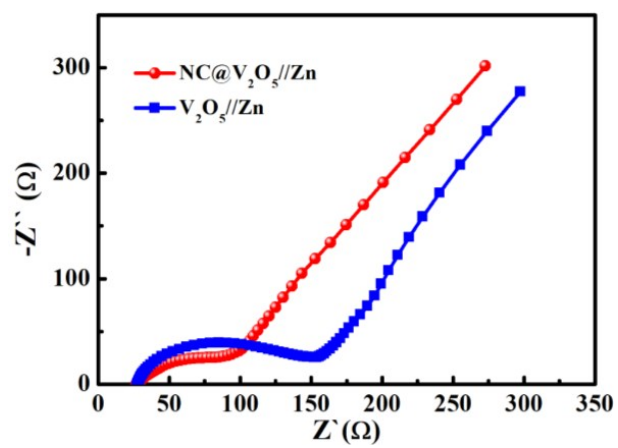

**Figure S12** The Nyquist plots of  $\text{NC@V}_2\text{O}_5//\text{Zn}$  and  $\text{V}_2\text{O}_5//\text{Zn}$  batteries.

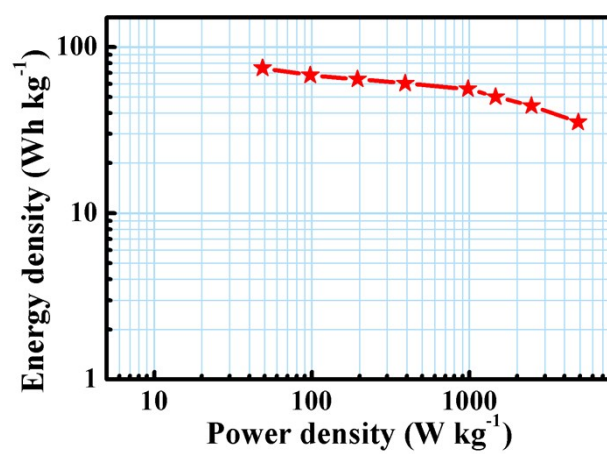

**Figure S13** Specific energy and power densities of the device.

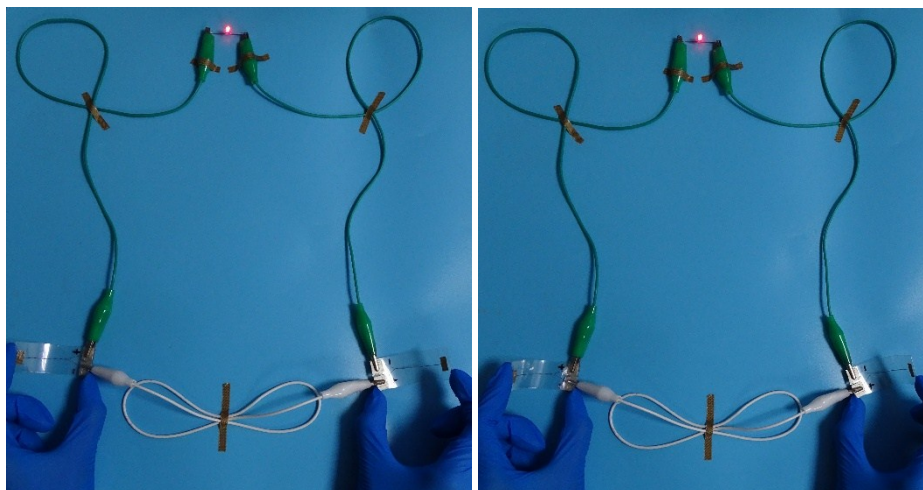

**Figure S14** A LED powered by two fiber-shaped batteries in series under various bend angles.
